# Supplementary material for: Flavonoid-Rich Extract of Paeonia lactiflora Petals Alleviate d-Galactose-Induced Oxidative Stress and Restore Gut Microbiota in ICR Mice
Source: MDPI journal article supplement (doi:10.3390/antiox10121889), 2021-11-26
Supplement: s1 [file s1]

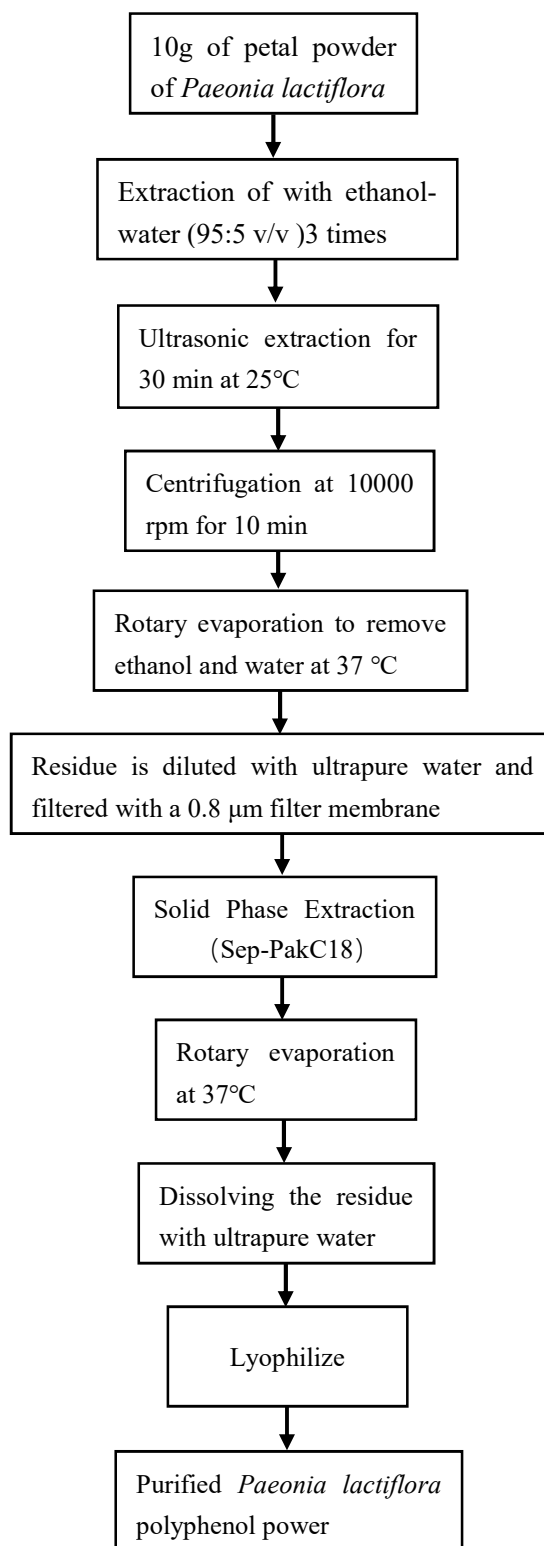

**Figure S1.** Diagram for the obtainment of purified *Paeonia lactiflora* petal flavonoids.

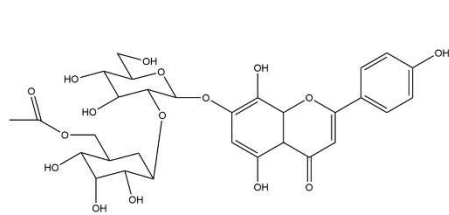

**Isoscutellarein 7-(6'-acetylallosyl-(1->2)-glucoside) (1)**

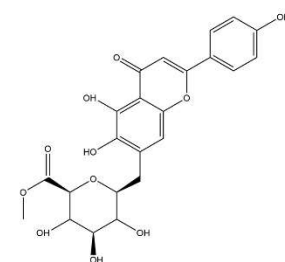

**Scutellarin methylester (2)**

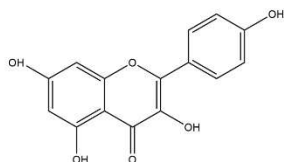

**Kaempferol (3)**

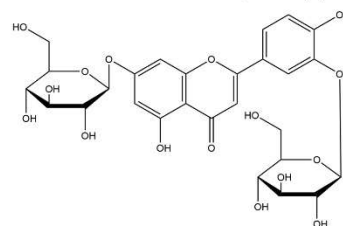

**Luteolin-3',7'-Diglucoside (4)**

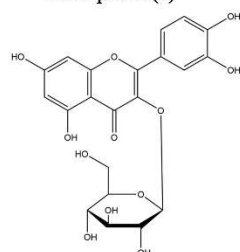

**Quercetin-3-beta-D-glucoside (5)**

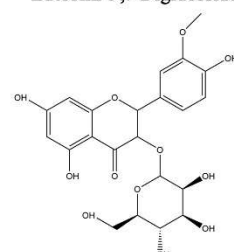

**Isorhamnetin 3-galactoside (6)**

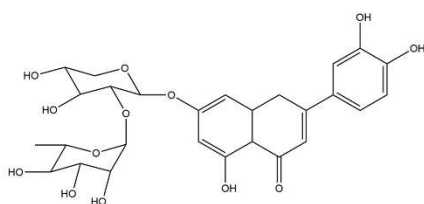

**Luteolin 7-(6-malonylneohesperidoside) (7)**

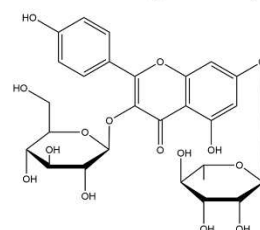

**Kaempferol-3-O-beta-glucopyranosyl-7-O-alpha-rhamnopyranoside (8)**

**Figure S2.** Chemical structures of some main compounds in *Paeonia lactiflora* petal flavonoids

**Table S1.** Flavonoid compounds components in *Paeonia lactiflora* petal extract (PPF)

| No. | Compounds                                                               | CAS         | Molecular Formula                               | Concentration, $\mu\text{g/g}$ extract |
|-----|-------------------------------------------------------------------------|-------------|-------------------------------------------------|----------------------------------------|
| 1   | 6-Methoxyluteolin                                                       | 520-11-6    | C <sub>16</sub> H <sub>12</sub> O <sub>7</sub>  | 17.98                                  |
| 2   | Diosmetin                                                               | 520-34-3    | C <sub>16</sub> H <sub>12</sub> O <sub>6</sub>  | 35.48                                  |
| 3   | Quercetin                                                               | 117-39-5    | C <sub>15</sub> H <sub>10</sub> O <sub>7</sub>  | 102.57                                 |
| 4   | Naringenin                                                              | 480-41-1    | C <sub>15</sub> H <sub>12</sub> O <sub>5</sub>  | 12.60                                  |
| 5   | Isorhamnetin                                                            | 480-19-3    | C <sub>16</sub> H <sub>12</sub> O <sub>7</sub>  | 78.46                                  |
| 6   | Luteolin-3',7-Diglucoside                                               | 52187-80-1  | C <sub>27</sub> H <sub>30</sub> O <sub>16</sub> | 202.61                                 |
| 7   | Kaempferol-3-O-glucorhamnoside                                          | 482-39-3    | C <sub>21</sub> H <sub>20</sub> O <sub>10</sub> | 10.28                                  |
| 8   | Quercetin-3 $\beta$ -D-glucoside                                        | 482-35-9    | C <sub>21</sub> H <sub>20</sub> O <sub>12</sub> | 198.45                                 |
| 9   | Kaempferol-3-O- $\beta$ -glucopyranosyl-7-O- $\alpha$ -rhamnopyranoside | NA          | C <sub>27</sub> H <sub>30</sub> O <sub>15</sub> | 117.69                                 |
| 10  | Kaempferol                                                              | 520-18-3    | C <sub>15</sub> H <sub>10</sub> O <sub>6</sub>  | 304.56                                 |
| 11  | Cyanidin 3-O-glucoside                                                  | 7084-24-4   | C <sub>21</sub> H <sub>20</sub> O <sub>11</sub> | 74.28                                  |
| 12  | Quercetin 3-O-malonylglucoside                                          | 96862-01-0  | C <sub>24</sub> H <sub>22</sub> O <sub>15</sub> | 23.30                                  |
| 13  | 6-Methoxyluteolin 7-glucuronide methyl ester                            | NA          | C <sub>23</sub> H <sub>22</sub> O <sub>13</sub> | 82.50                                  |
| 14  | Isoscutellarein 7- (6'-acetylallosyl- (1->2) -glucoside)                | NA          | C <sub>29</sub> H <sub>32</sub> O <sub>17</sub> | 648.70                                 |
| 15  | Isorhamnetin 3-galactoside                                              | 6743-92-6   | C <sub>22</sub> H <sub>22</sub> O <sub>12</sub> | 158.11                                 |
| 16  | Dihydrokaempferol                                                       | 480-20-6    | C <sub>15</sub> H <sub>12</sub> O <sub>6</sub>  | 58.03                                  |
| 17  | Scutellarin methylester                                                 | 119262-68-9 | C <sub>22</sub> H <sub>20</sub> O <sub>12</sub> | 405.20                                 |
| 18  | Luteolin 7- (6-malonylneoheperidoside)                                  | NA          | C <sub>30</sub> H <sub>32</sub> O <sub>18</sub> | 121.23                                 |
| 19  | Genistein                                                               | 446-72-0    | C <sub>15</sub> H <sub>10</sub> O <sub>5</sub>  | 4.44                                   |
| 20  | Rhamnetin                                                               | 90-19-7     | C <sub>16</sub> H <sub>12</sub> O <sub>7</sub>  | 9.19                                   |
| 21  | Okanin-4'-O-glucoside                                                   | 535-96-6    | C <sub>21</sub> H <sub>22</sub> O <sub>11</sub> | 1.85                                   |
